# Supplementary material for: Electron spin dynamics in excited state photochemistry: recent development in the study of intersystem crossing and charge transfer in organic compounds
Source: Royal Society of Chemistry journal article supplement (doi:10.1039/d1cp01937f), 2021-01-01

## Electronic Supplementary Information:

# Electron spin dynamics in excited state photochemistry: recent development in the study of intersystem crossing and charge transfer in organic compounds

Muhammad Imran,<sup>a‡</sup> Xue Zhang,<sup>a‡</sup> Zhijia Wang,<sup>a‡</sup> Xi Chen,<sup>a</sup> Jianzhang Zhao,<sup>\*a</sup> Antonio Barbon<sup>\*b</sup>  
and Violeta K. Voronkova<sup>\*c</sup>

<sup>a</sup> *State Key Laboratory of Fine Chemicals, School of Chemical Engineering, Dalian University of  
Technology, 2 Ling-Gong Road, Dalian 116024, P.R. China. E-mail: zhaojzh@dlut.edu.cn*

<sup>b</sup> *Dipartimento di Scienze Chimiche, Università degli Studi di Padova, Via Marzolo 1, 35131 Padova,  
Italy. E-mail: antonio.barbon@unipd.it*

<sup>c</sup> *Zavoisky Physical-Technical Institute, FRC Kazan Scientific Center of Russian Academy of Sciences,  
Kazan 420029, Russia. E-mail: vio@kfti.knc.ru*

‡ These authors contributed equally to this work.

**Table. S1** Molecular structures of compounds presented in section 2 and Table 1 in the main text of the manuscript

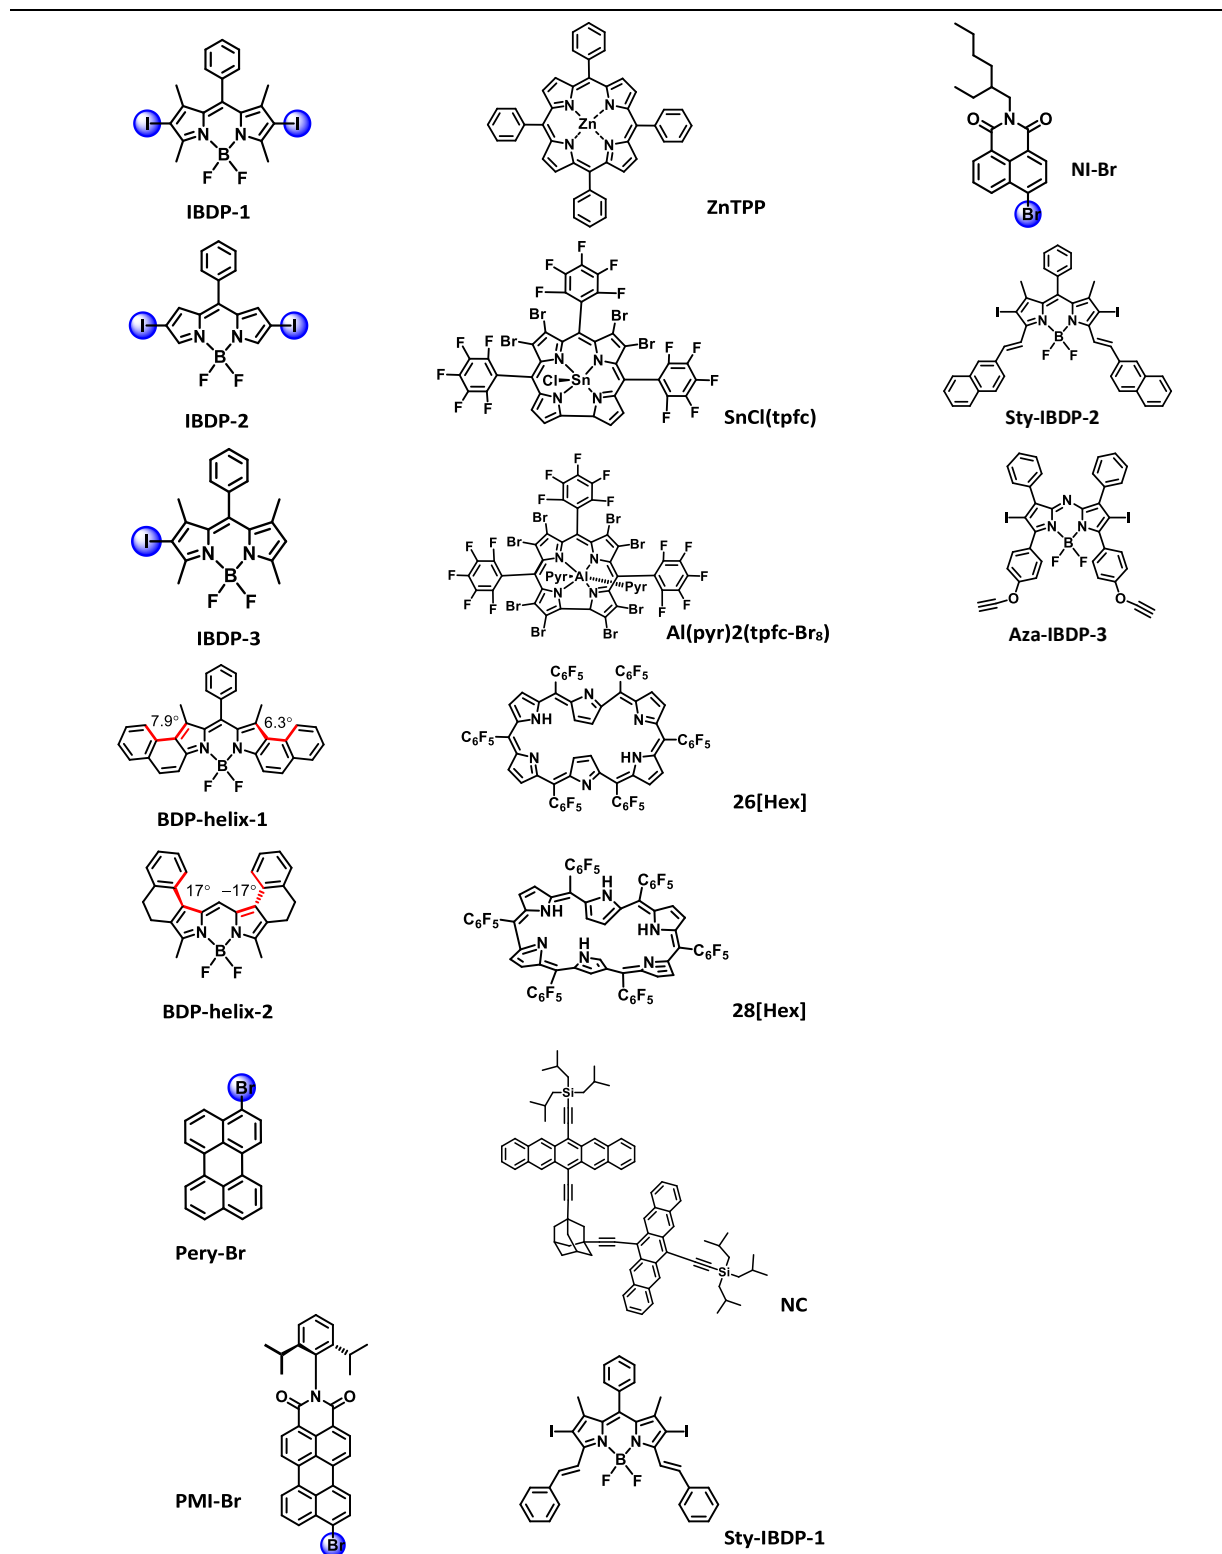

**Table. S2** Molecular structures of compounds presented in section 3 and Table 2 in the main text of manuscript

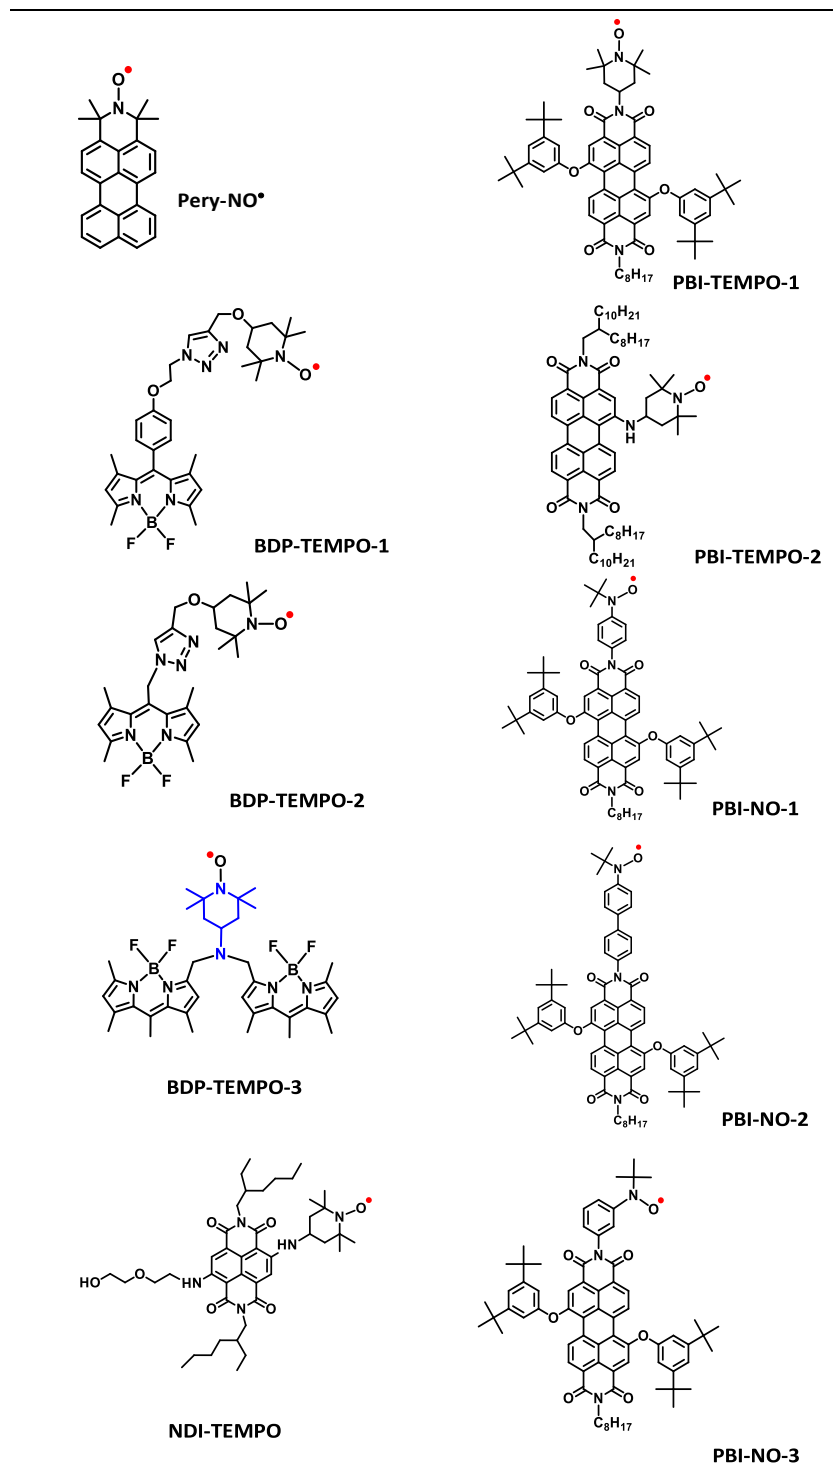

**Table. S3** Molecular structures of compounds presented in section 4 and Table 3 in the main text of the manuscript

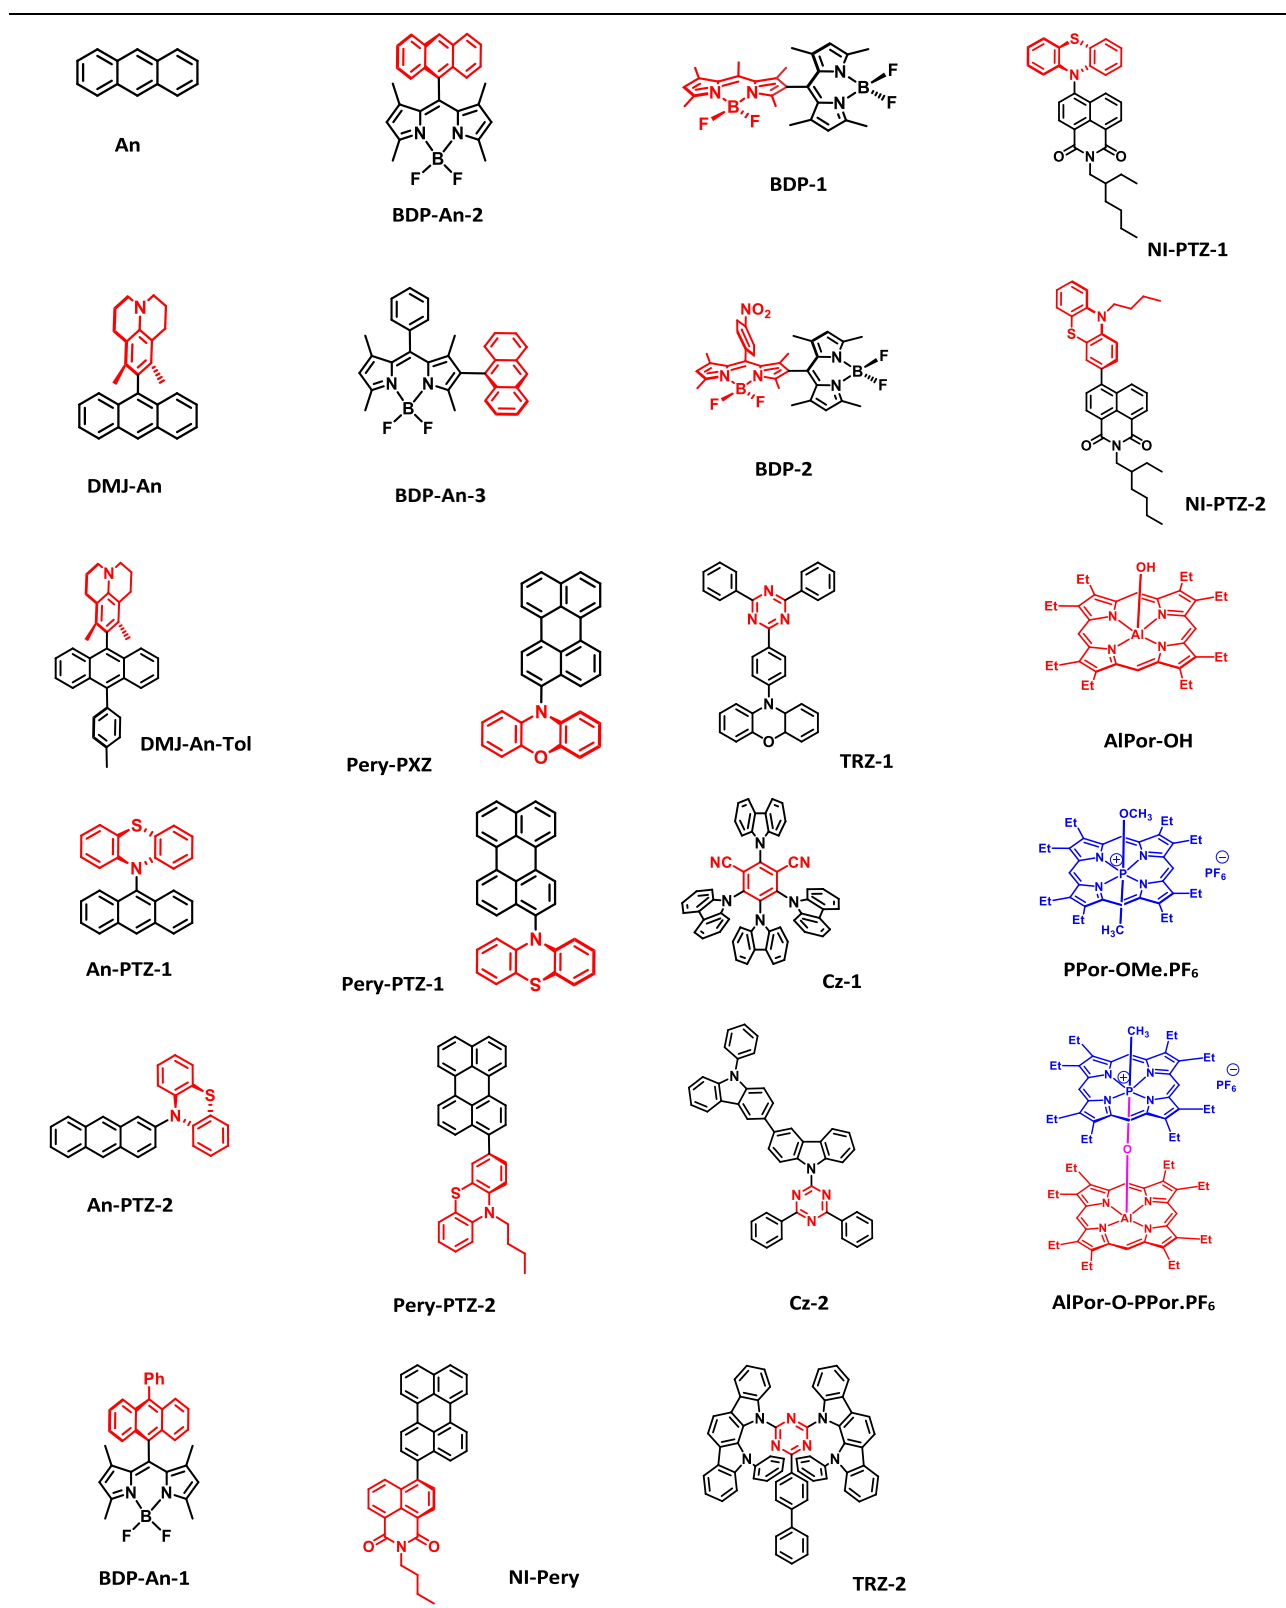

Supplement: d1cp01937f1.pdf [file d1cp01937f1.pdf]
